# Supplementary material
Source: publisher figshare collection journal article supplement (https://sage.figshare.com/ndownloader/files/22090005)
Supplement: Supplementary file 1 [file 22090005]

Appendix 2.

*Intercorrelations among the Factors and the Total Score of the SoC-EA across the Three Waves*

|                          | 1   | 2   | 3   | 4   | 5   | 6   | 7   | 8   | 9   | 10  | 11  | 12 | 13 | 14 | 15 | 16 | 17 | 18 |
|--------------------------|-----|-----|-----|-----|-----|-----|-----|-----|-----|-----|-----|----|----|----|----|----|----|----|
| T1 (N = 554)             |     |     |     |     |     |     |     |     |     |     |     |    |    |    |    |    |    |    |
| 1. SECP                  | —   |     |     |     |     |     |     |     |     |     |     |    |    |    |    |    |    |    |
| 2. SB                    | .47 | —   |     |     |     |     |     |     |     |     |     |    |    |    |    |    |    |    |
| 3. OI                    | .47 | .50 | —   |     |     |     |     |     |     |     |     |    |    |    |    |    |    |    |
| 4. SECC                  | .56 | .54 | .53 | —   |     |     |     |     |     |     |     |    |    |    |    |    |    |    |
| 5. SNOI                  | .67 | .57 | .55 | .66 | —   |     |     |     |     |     |     |    |    |    |    |    |    |    |
| 6. SoC-EA (total scale)  | .81 | .74 | .75 | .82 | .88 | —   |     |     |     |     |     |    |    |    |    |    |    |    |
| T2 (N = 560)             |     |     |     |     |     |     |     |     |     |     |     |    |    |    |    |    |    |    |
| 7. SECP                  | .52 | .32 | .23 | .28 | .39 | .44 | —   |     |     |     |     |    |    |    |    |    |    |    |
| 8. SB                    | .30 | .48 | .18 | .27 | .33 | .38 | .58 | —   |     |     |     |    |    |    |    |    |    |    |
| 9. OI                    | .29 | .36 | .37 | .29 | .32 | .40 | .50 | .52 | —   |     |     |    |    |    |    |    |    |    |
| 10. SECC                 | .28 | .40 | .26 | .42 | .37 | .43 | .55 | .56 | .52 | —   |     |    |    |    |    |    |    |    |
| 11. SNOI                 | .41 | .36 | .27 | .36 | .51 | .48 | .72 | .60 | .52 | .66 | —   |    |    |    |    |    |    |    |
| 12. SoC-EA (total scale) | .45 | .46 | .32 | .40 | .49 | .53 | .84 | .77 | .73 | .81 | .89 | —  |    |    |    |    |    |    |

|                          | 1   | 2   | 3   | 4   | 5   | 6   | 7   | 8   | 9   | 10  | 11  | 12  | 13  | 14  | 15  | 16  | 17  | 18 |
|--------------------------|-----|-----|-----|-----|-----|-----|-----|-----|-----|-----|-----|-----|-----|-----|-----|-----|-----|----|
| T3 (N = 519)             |     |     |     |     |     |     |     |     |     |     |     |     |     |     |     |     |     |    |
| 13. SECP                 | .44 | .29 | .20 | .31 | .43 | .43 | .54 | .32 | .29 | .39 | .50 | .52 | —   |     |     |     |     |    |
| 14. SB                   | .25 | .47 | .21 | .28 | .34 | .38 | .37 | .52 | .31 | .45 | .43 | .50 | .57 | —   |     |     |     |    |
| 15. OI                   | .21 | .26 | .35 | .26 | .31 | .35 | .28 | .22 | .42 | .33 | .34 | .39 | .48 | .50 | —   |     |     |    |
| 16. SECC                 | .28 | .35 | .21 | .39 | .39 | .41 | .36 | .38 | .27 | .54 | .44 | .50 | .60 | .61 | .50 | —   |     |    |
| 17. SNOI                 | .28 | .26 | .16 | .28 | .42 | .36 | .38 | .32 | .24 | .42 | .54 | .48 | .71 | .65 | .52 | .67 | —   |    |
| 18. SoC-EA (total scale) | .36 | .39 | .27 | .37 | .47 | .47 | .48 | .42 | .37 | .52 | .56 | .58 | .84 | .79 | .71 | .82 | .89 | —  |

*Note.* All the correlation coefficients were significant at  $p < 0.001$ . SECC = Support and Emotional Connection in the Community; SECP = Support and Emotional Connection with Peers; SNOI = Satisfaction of Needs and Opportunities for Involvement; OI = Opportunity for Influence; SB = Sense of Belonging.
